# Supplementary material for: Pipette-like action of a reusable and NIR light-responsive film for the aspiration and removal of viable cancer cells
Source: Royal Society of Chemistry journal article supplement (doi:10.1039/c9nj05449a), 2020-01-01
Supplement: c9nj05449a1.pdf [file c9nj05449a1.pdf]

## SUPPORTING INFORMATION FOR

### **Like A Pipette to Aspirate and Remove Viable Cancer Cells:**

### **A Reusable and NIR Light-Responsive Film**

Yang Lei<sup>‡,a</sup>, Haixia Ye<sup>‡,a</sup>, Siqi Xiang<sup>a</sup>, Yuan Huang<sup>a</sup>, Chao Zhu<sup>a</sup>, Weiyang Zhang<sup>\*,a</sup>, Yong Chen<sup>b</sup>  
and Yiping Cao<sup>\*,a</sup>

*a. Institute for Interdisciplinary Research & Key Laboratory of Optoelectronic Chemical  
Materials and Devices of Ministry of Education, Jiangnan University, Wuhan 430056, China.*

*b. Département de Chimie, Ecole Normale Supérieure, 24 Rue Lhomond, F-75231 Paris Cedex  
05, France.*

\*Address correspondence to

cyp@jhun.edu.cn (Y. Cao)

weiyang.zhang@jhun.edu.cn (W. Zhang)

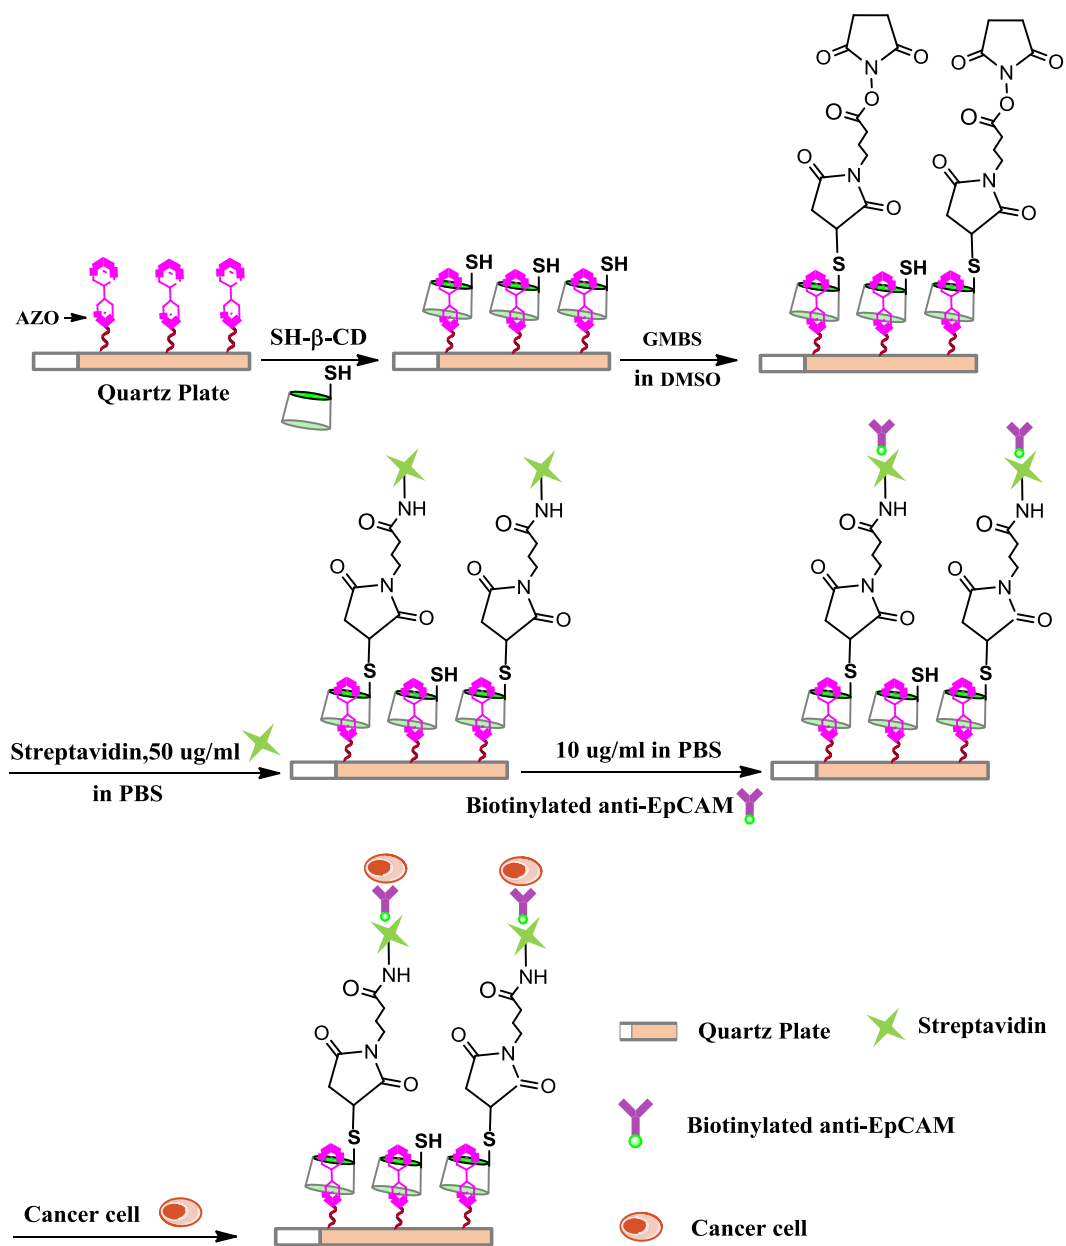

**Scheme S1.** Surface modification procedure of the polyelectrolyte multilayers on quartz slide with antibody.

### X-ray Diffraction (XRD) measurements of prepared UCNPs

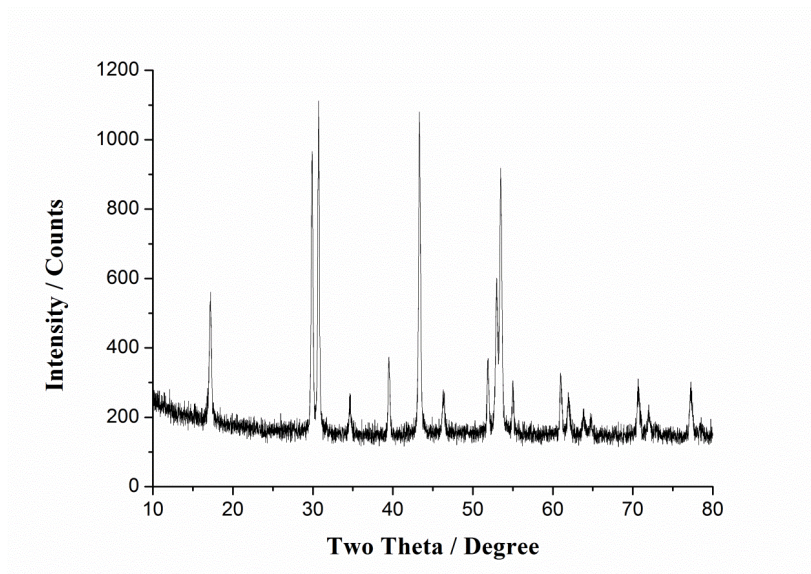

Figure S1. XRD patterns for NaYF<sub>4</sub>:Tm/Yb nanocrystals

### FTIR measurements of prepared UCNPs and UCNPs@SiO<sub>2</sub>

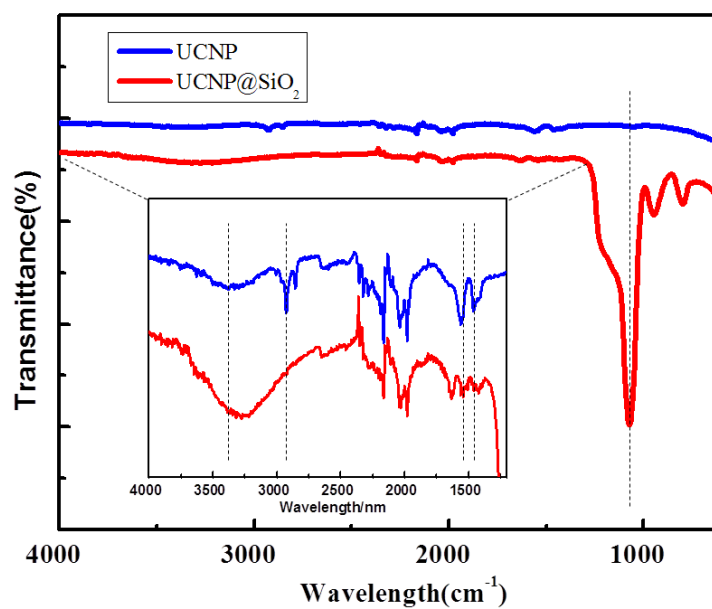

Figure S2. FTIR spectra of NaYF<sub>4</sub>:Tm/Yb nanocrystals with and without silica coating.

### NIR Activating Photoresponsive Isomerization

In order to calculate the power of the radiation area, the obtained UCNPs@SiO<sub>2</sub> were dispersed in ethanol and deposited on a quartz slides. Then, the quartz substrate loading UCNPs@SiO<sub>2</sub> was exposed to 980 nm NIR laser. The continuous wave 980nm NIR laser (MDL-N-980, Changchun New Industries Optoelectronics Technology Co., Ltd.) was used for irradiation. The power of the laser was calibrated using a UV-A radiometer (Beijing Normal University Optical Instrument Factory, China). As illustrated in Scheme S2, with the distance of 2.0 cm, the irradiation area of the 980 nm laser was a round spot with the diameter of 6.02 mm. Upconversion luminescence spectra and UV-vis spectra were measured to confirm the isomerization of the *trans*-azo group into *cis*-azo when the mixed solutions were irradiated by 980 nm NIR. Control experiment was done without any NIR irradiation.

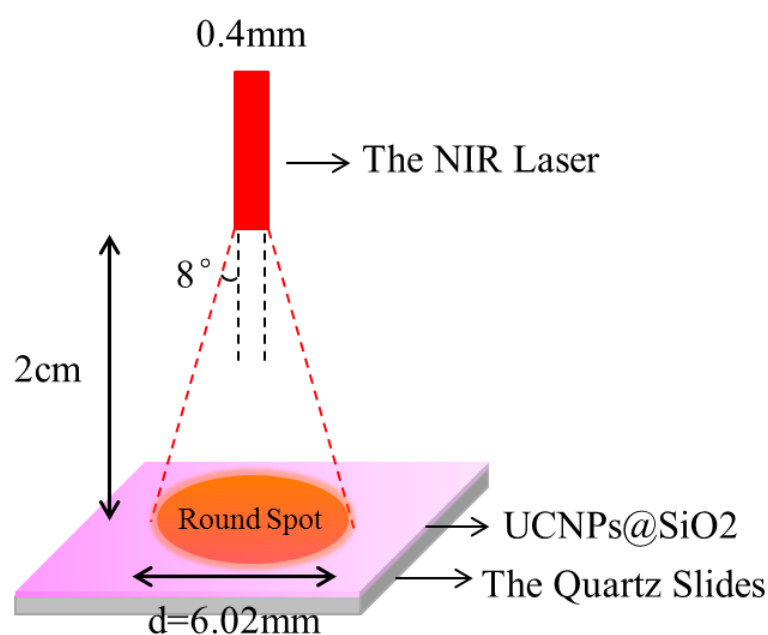

**Scheme S2.** Scheme of the NIR irradiation on the azo/UCNPs solutions or the substrate. The NIR light was from an external adjustable 980 nm laser (2 W). The sample was placed 2 cm away from the optical fiber.

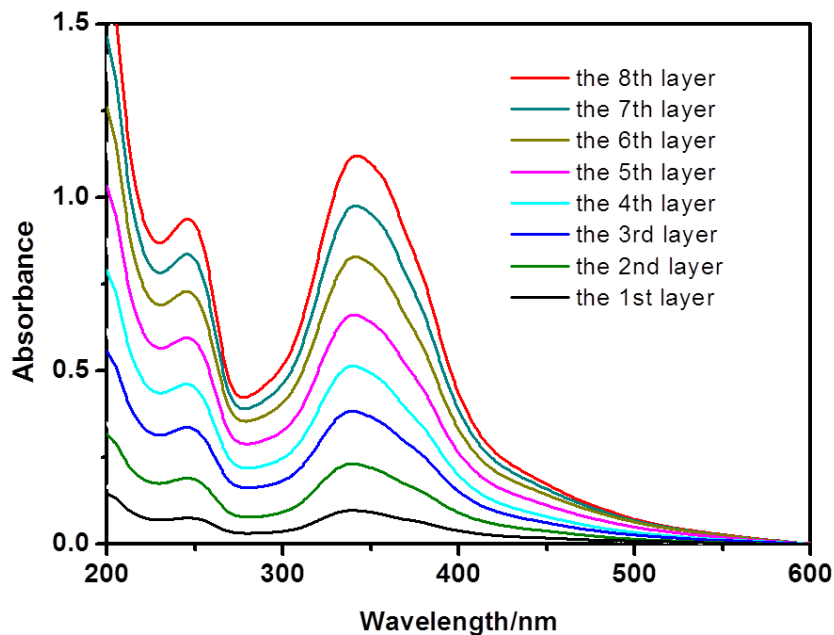

**Figure S3.** Absorption spectra of the multilayers of  $(\text{PAA-C}_2\text{-Azo/Chi})_{m=7}/\text{PAA-C}_2\text{-Azo}$  assembled on a APTES-coated quartz glass substrate (“ $m$ ” denotes the total number of bilayers), measured after each azo-polymer dipping. The absorption bands between 300 and 400 nm are mainly attributed to *trans*-azobenzene ( $\pi\text{-}\pi^*$  transition), and their intensities increase with the number of dipping, which indicates the buildup of multilayers in a Layer-by-Layer manner.

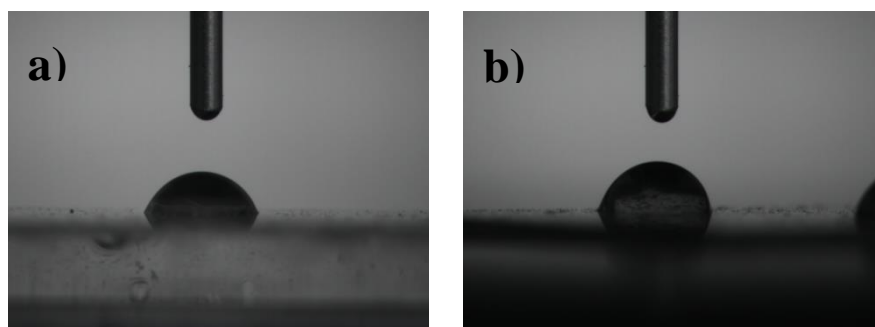

**Figure S4.** The shapes of water drops on a  $(\text{PAA-C}_2\text{-Azo/Chi})_{m=5}/\text{PAA-C}_2\text{-Azo}$  film with flat quartz slide: (a) as-prepared, (b) after heat treatment at 110 °C for 1 h.

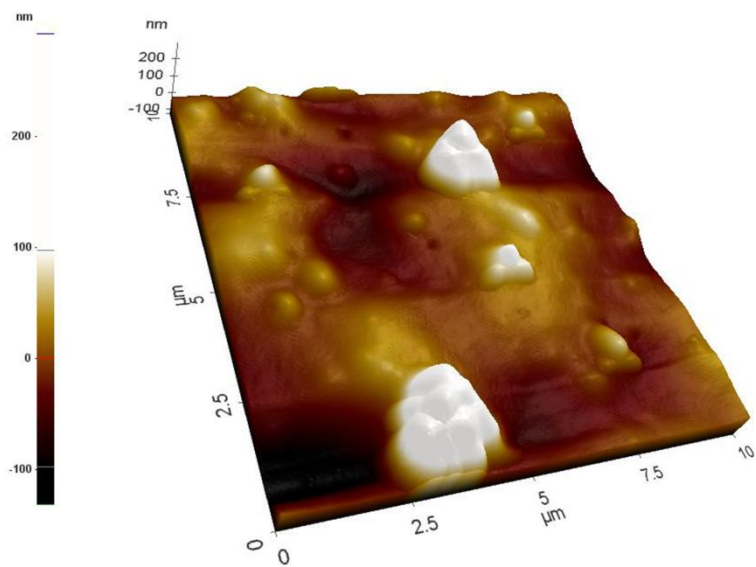

**Figure S5.** AFM image of the surface of cross-linked (PAA-C<sub>2</sub>-Azo/Chi)<sub>6</sub>/PAA-C<sub>2</sub>-Azo film. The scan size is 10 μm × 10 μm.

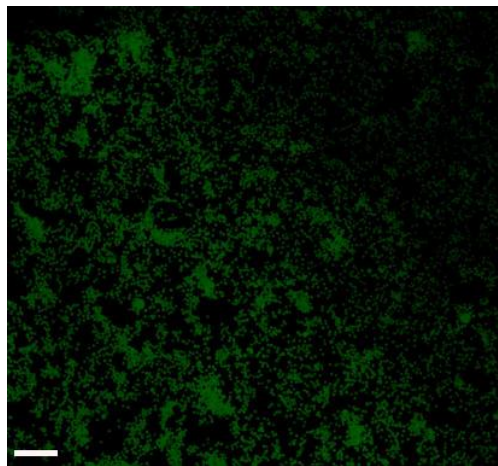

**Figure S6.** Immunofluorescent staining of EpCAM-loaded quartz slide surface. Secondary immunofluorescent labeled antibody (IF Kine Green AffiniPure Donkey Anti-Goat IgG) was used, shown here is EpCAM expression in green. The scale bars are 100 μm.

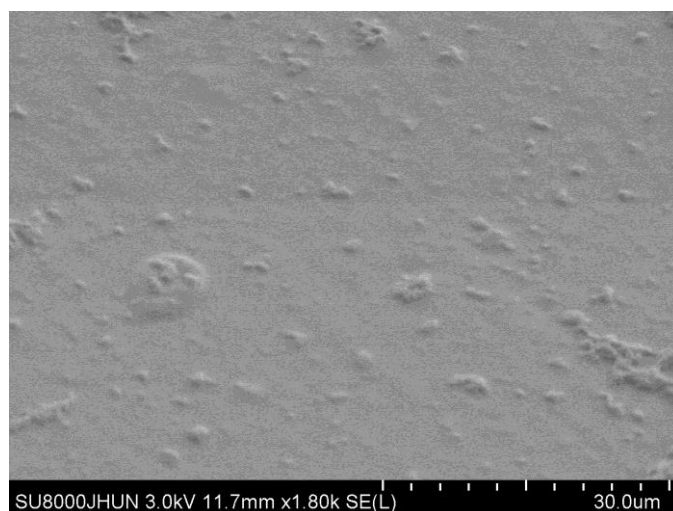

**Figure S7.** SEM image of antibody-immobilized (PAA-C<sub>2</sub>-Azo/Chi)<sub>6</sub>/PAA-C<sub>2</sub>-Azo multilayer. The scale bars are 30  $\mu$ m.

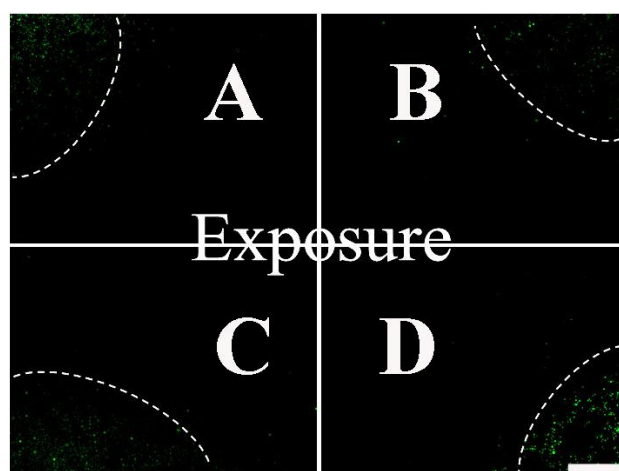

**Figure S8.** Fluorescence image of NIR light-induced cells release with pattern light irradiation. The substrate was immersed in pH 7.4 PBS solution containing the UCNPs (50 mg/mL). Then the laser was fixed on different parts of substrate (A, B, C and D), followed respectively by a 20 min NIR light exposure (2 min break after 2 min irradiation to avoid heating effect on cells). The scale bars are 500  $\mu$ m.

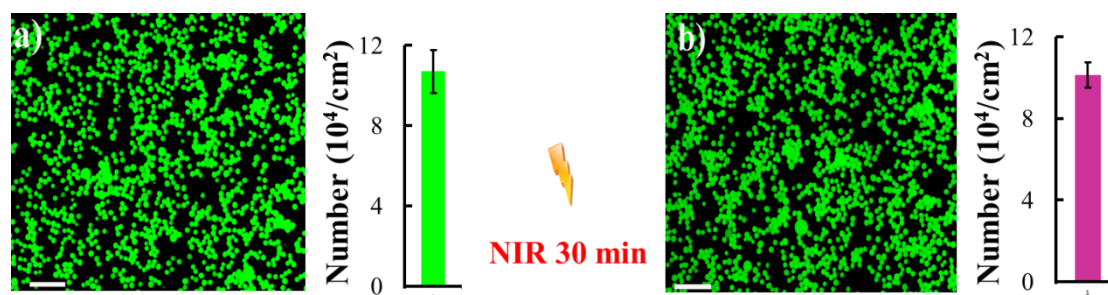

**Figure S9.** Fluorescence images of NIR light-induced cells release on the multilayer we designed without UCNP@SiO<sub>2</sub> in the culture medium. The scale bars are 100  $\mu$ m.

### Release Kinetics

The release kinetics of  $\beta$ -CD-RhB is evaluated by monitoring its absorbance at 566 nm. In brief, an as-prepared  $m = 6$  cross-linked film on a quartz slide ( $12 \times 20 \times 1$  mm) was immersed into the  $\beta$ -CD-RhB solution (30 mL, 2 mg/mL), and then agitated them on an air bath constant temperature oscillator at 25  $^{\circ}$ C overnight, followed by a washing with neutral water. Then, the quartz slide was put into 30 mL UCNPs solutions (50 mg/mL), and  $\beta$ -CD-RhB release behaviors were evaluated by measuring the absorbance of  $\beta$ -CD-RhB in the multilayer at 566 nm upon NIR light irradiation for a predetermined time. The sample was placed 2 cm away from the laser. The surrounding temperature of the sample was controlled at 25  $^{\circ}$ C using a cold plate.



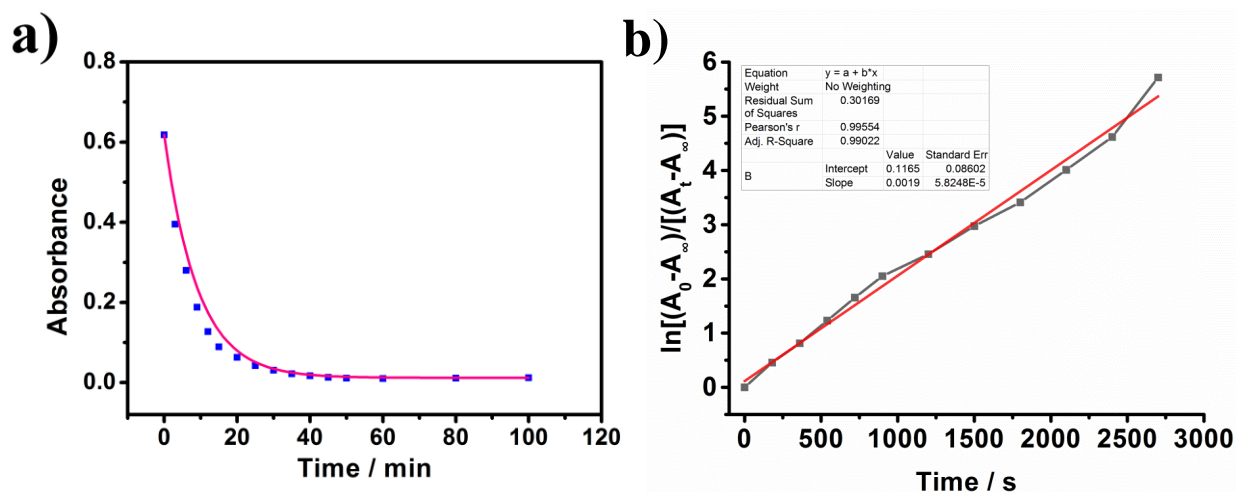

**Figure S10.** a) NIR remote-controllable release behavior from  $m = 6$  dye-loaded film in neutral water upon NIR light (980 nm) irradiation, followed by measuring the absorbance of  $\beta$ -CD-RhB at 566 nm of the film. The red line represents the best fit to a first order exponential release model. b) The release kinetics of  $\beta$ -CD-RhB (monitored at 566 nm). Rate constant is found to be  $1.9 \times 10^{-3} \text{ s}^{-1}$ .

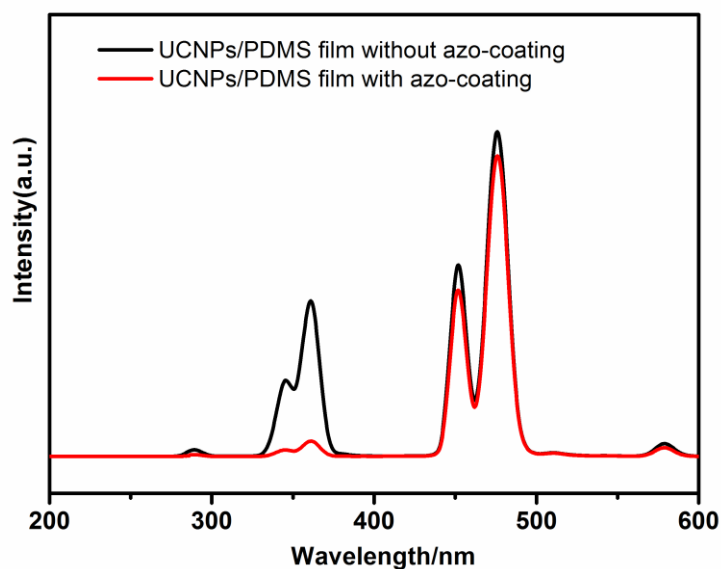

**Figure S11.** Emission spectra of UCNPs/PDMS film without multilayers and multilayer-assembled UCNPs/PDMS film upon NIR light exposure at 980 nm.
